# Supplementary material
Source: HighWire-hosted journal article supplement (https://jnm.snmjournals.org/highwire/filestream/95272/field_highwire_adjunct_files/0/195628_Supplemental_Data.pdf)
Supplement: 195628_Supplemental_Data.pdf [file 195628_Supplemental_Data.pdf]

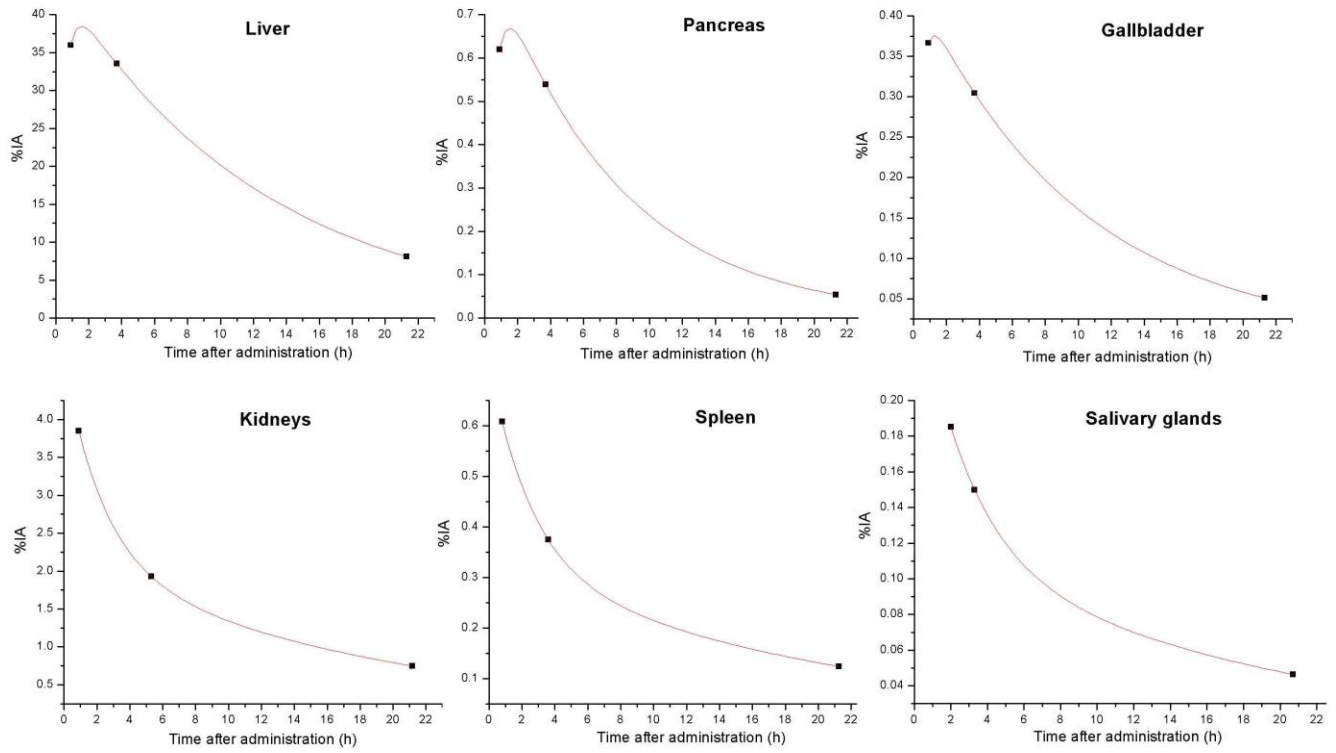

**Supplemental Fig. 1:** Typical time-activity curves of  $^{64}\text{CuCl}_2$  (as a percentage of injected activity) for source organs.

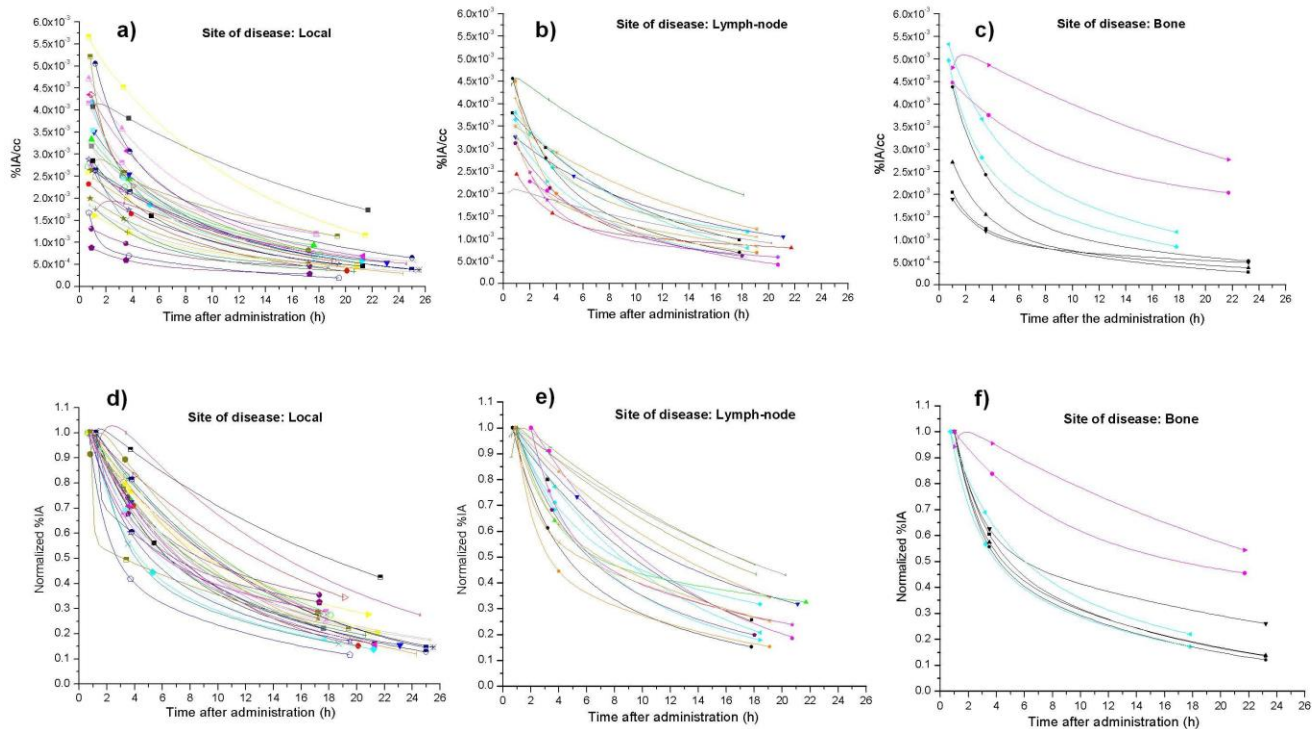

**Supplemental Fig. 2:** Time-activity curves of  $^{64}\text{CuCl}_2$  (as a percentage of injected activity/cc) for three different site of disease: local (A), lymph-node (B) and bone (C) relapse. Figures D, E) and F) show the normalized time-activity curves.

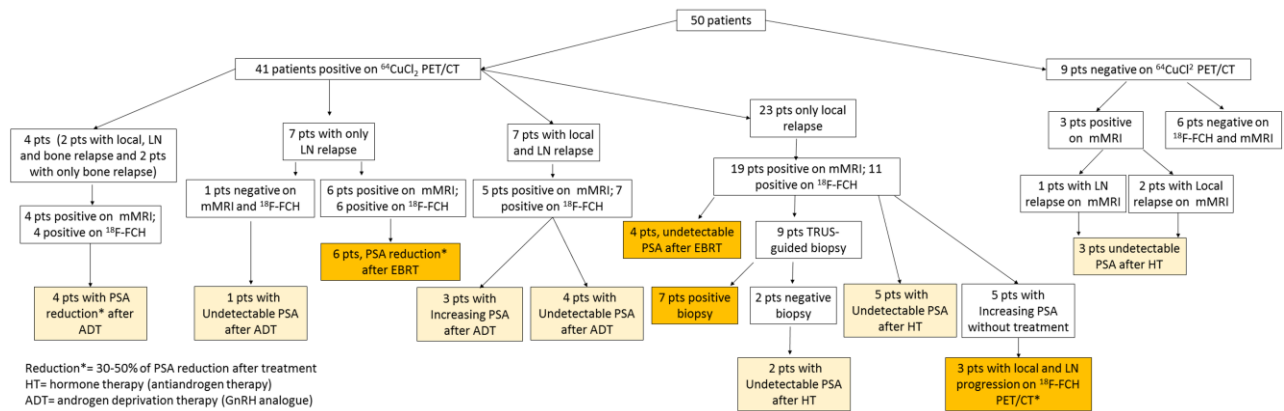

Reduction\*= 30-50% of PSA reduction after treatment  
 HT= hormone therapy (antiandrogen therapy)  
 ADT= androgen deprivation therapy (GnRH analogue)

**Supplemental Fig. 3:** concordance between the different diagnostic modalities and detailed description of the multidisciplinary standard of reference for each patients. In particular, a robust standard of reference (orange “boxes”) was available in 11 of the 23 patients with evidence of local relapse on  $^{64}\text{CuCl}_2$ -PET/CT.

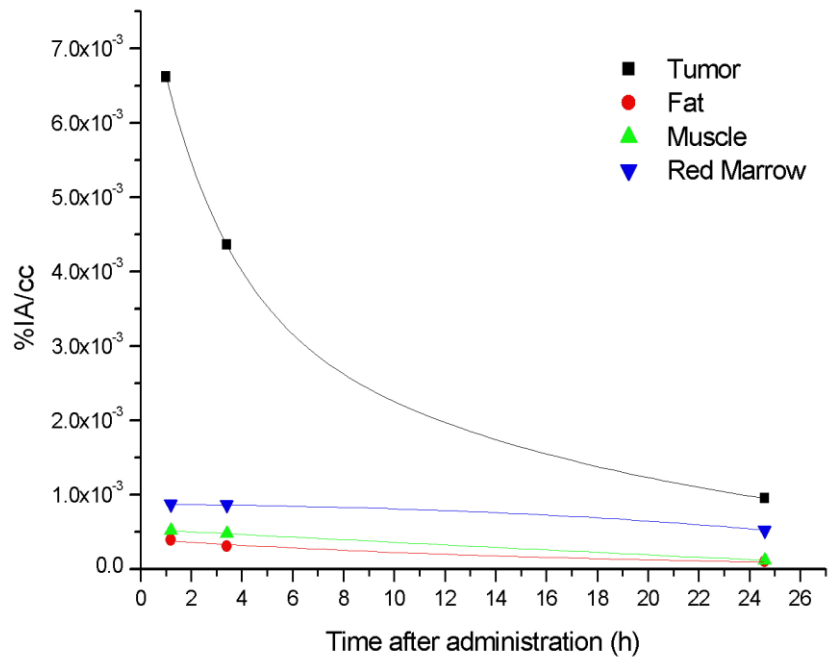

**Supplemental Fig 4:** typical time-activity curves of <sup>64</sup>CuCl<sub>2</sub> (as a percentage of injected activity/cc) of fat, marrow and muscles compared with that of one site of disease.

**Supplemental table 1.** Patients based analysis by Radical Prostatectomy (yes/no). DR (%) & [95%CI] were calculated for each single diagnostic modality in each site of disease.

| Site of disease       | RP       | <sup>64</sup> CuCl <sub>2</sub><br>PET/CT | <sup>18</sup> F-Choline<br>PET/CT | p*     | mpMRI                    | p*  |
|-----------------------|----------|-------------------------------------------|-----------------------------------|--------|--------------------------|-----|
| All positive patients | yes      | 24/33 (73%)<br>[54 ÷ 87]                  | 13/33 (39%)<br>[23 ÷ 58]          | 0.001  | 22/33 (67%)<br>[48 ÷ 82] | 0.7 |
|                       | no       | 17/17 (100%)<br>[80 ÷ 100]†               | 15/17 (88%)<br>[64 ÷ 99]          | 0.5    | 15/17 (88%)<br>[64 ÷ 99] | 0.5 |
|                       | p-value‡ | 0.02                                      | 0.001                             |        | 0.2                      |     |
| Local                 | yes      | 16/33 (48%)<br>[31 ÷ 66]                  | 3/33 (9%)<br>[2 ÷ 24]             | <0.001 | 13/33 (39%)<br>[23 ÷ 58] | 0.5 |
|                       | no       | 16/17 (94%)<br>[71 ÷ 100]                 | 12/17 (71%)<br>[44 ÷ 90]          | 0.1    | 12/17 (71%)<br>[44 ÷ 90] | 0.1 |
|                       | p-value‡ | 0.002                                     | <0.001                            |        | 0.07                     |     |
| Lymph-node            | yes      | 11/33 (33%)<br>[18 ÷ 52]                  | 10/33 (30%)<br>[16 ÷ 49]          | 1.0    | 10/33 (30%)<br>[16 ÷ 49] | 1.0 |
|                       | no       | 5/17 (29%)<br>[10 ÷ 56]                   | 5/17 (29%)<br>[10 ÷ 56]           | 1.0    | 4/17 (24%)<br>[7 ÷ 50]   | 1.0 |
|                       | p-value‡ | 1.0                                       | 1.0                               |        | 0.7                      |     |
| Bone                  | yes      | 4/33 (12%)<br>[3 ÷ 28]                    | 4/33 (12%)<br>[3 ÷ 28]            | 1.0    | 5/33 (15%)<br>[5 ÷ 32]   | 1.0 |
|                       | no       | 0/17 (0%)<br>[0 ÷ 20]†                    | 0/17 (0%)<br>[0 ÷ 20]†            | 1.0    | 0/17 (0%)<br>[0 ÷ 20]†   | 1.0 |
|                       | p-value‡ | 0.3                                       | 0.3                               |        | 0.2                      |     |

Abbr.: 95%CI: 95% exact confidence interval; RP=Radical Prostatectomy. \*McNemar test vs. <sup>64</sup>CuCl<sub>2</sub> PET/CT; † One-sided, 97.5% confidence interval; ‡ Fisher-exact test for difference in detection rates between RP yes and RP no.
